# Supplementary material
Source: PubMed Central journal article supplement (PMC4192072)
Supplement: NIHMS631210-supplement-2.pdf [file NIHMS631210-supplement-2.pdf]

## **Supplemental Figure legends**

### **Figure S1, related to Figure 1. mRNA levels**

- (A) Relative mRNA expression of three FoxO isoforms in normal islets.
- (B) mRNA levels of three FoxO isoforms in islets of mice fed normal chow (NC) or high-fat diet (HFD) for 30 weeks.
- (C) Quantification of mRNA encoding the main pancreatic hormones in wildtype and  $\beta$ -FoxO KO mice.
- (D) mRNA analysis of markers of  $\beta$ -cell function, pluripotency, and progenitor cells in 10-month-old  $\beta$ -FoxO KO and wildtype mice. Each experiment (n=3 per group) was performed with pooled islets from 3-4 mice per genotype. Each data point consists of 4 replicates. Data represent means  $\pm$  SEM. \* $p$ <0.05, \*\* $p$ <0.01, \*\*\* $p$ <0.001 by Student's  $t$  test.

### **Figure S2, related to Figure 2. Insulin tolerance tests and glucose levels during hyperglycemic clamp**

- (A) Glucose levels, plotted as % of basal values, following intraperitoneal injection of insulin (0.15 U/kg) in wildtype and  $\beta$ -FoxO KO mice (n=8 mice per genotype).
- (B) Clamp glucose level. The data represent means  $\pm$  SEM.

### **Figure S3, related to Figure 3. Marker analysis of $\beta$ -FoxO KO islets**

- (A) Immunohistochemistry showing a representative image with antibodies to Pcsk1, Pcsk2, Glut-2 and Pdx-1 in 24-week-old (n=4 mice per group, 3 sections per mouse).
- (B) Quantification of mRNA encoding  $\beta$ -cell transcription factors. Data represent means  $\pm$  SEM of qPCR analyses from mRNA extracted from 16-wk-old mice (n=3 per group).

Each experiment was performed with pooled islets from 3 mice per genotype. Each data point consists of 4 replicates.

**Figure S4, related to Figure 4. Lipid and glucose metabolism in KO islets**

(A) Phospholipid generation in isolated islets using  $^{14}\text{C}$ -labeled palmitate incorporation in the presence of low (2.8 mM) and high (16.7 mM) glucose concentrations.

(B) Free fatty acid (FFA) generation from labeled palmitate in isolated islets.

(C) Glucose or pyruvate stimulated insulin secretion in the absence or presence of etomoxir (1 $\mu\text{M}$ ) in primary islets. Each experiment (n=3 per group) was performed with pooled islets from 5 mice per genotype. Each data point consists of 6-9 replicates. All data are presented as means  $\pm$  SEM. \* $p < 0.05$  by Student's  $t$  test.

**Figure S5, related to Figure 6. Validation of RNA profiling data**

mRNA levels of selected target genes, including isoforms of L-type voltage-gated  $\text{Ca}^{2+}$  channels, protein kinase C, inositol-phosphate receptors, and phospholipase C. Each experiment (n=3 per group) was performed with pooled islets from 3 mice per genotype. Each data point consists of 3 replicates. All data are presented as means  $\pm$  SEM with  $p < 0.05$  by Student's  $t$  test. Asterisks are omitted for simplicity.

**Table S1, related to Table 1. Predicted activation state of cellular and molecular functions**

| <b>Category</b>                                                         | <b>Functions Annotation</b>       | <b>p-value</b>          | <b>Predicted Activation State</b> | <b>z-score</b> |
|-------------------------------------------------------------------------|-----------------------------------|-------------------------|-----------------------------------|----------------|
| <b>Cell Signaling / Vitamin and Mineral Metabolism</b>                  | Translocation of Ca <sup>2+</sup> | 5.09 x 10 <sup>-3</sup> | Decreased                         | -3.095         |
| <b>Gene Expression</b>                                                  | Expression of RNA                 | 3.20 x 10 <sup>-2</sup> | Decreased                         | -2.631         |
| <b>Cell Death</b>                                                       | Survival of tumor cell line       | 9.20 x 10 <sup>-3</sup> | Decreased                         | -2.319         |
| <b>Cellular Assembly and Organization</b>                               | Transport of vesicles             | 1.76 x 10 <sup>-4</sup> | Decreased                         | -2.178         |
| <b>Organismal Survival</b>                                              | Organism death                    | 1.79 x 10 <sup>-2</sup> | Increased                         | 2.050          |
| <b>Tissue Development</b>                                               | Extracellular matrix adhesion     | 1.40 x 10 <sup>-3</sup> | Increased                         | 2.081          |
| <b>Molecular Transport</b>                                              | Transport of fatty acid           | 3.45 x 10 <sup>-2</sup> | Increased                         | 2.167          |
| <b>Energy production/ Small Molecule Biochemistry/ Lipid Metabolism</b> | Oxidation of lipid                | 4.43 x 10 <sup>-3</sup> | Increased                         | 2.170          |
| <b>Energy production/ Small Molecule Biochemistry/ Lipid Metabolism</b> | Oxidation of fatty acid           | 2.28 x 10 <sup>-2</sup> | Increased                         | 2.211          |
| <b>Small Molecule Biochemistry/ Lipid Metabolism</b>                    | Cleavage of glycosphingolipid     | 7.53 x 10 <sup>-3</sup> | Increased                         | 2.401          |
| <b>Small Molecule Biochemistry/ Lipid Metabolism</b>                    | Cleavage of sphingolipid          | 1.91 x 10 <sup>-3</sup> | Increased                         | 2.599          |

The activation state of cellular and molecular functions in the described biological categories, selected from the analysis of the  $\beta$ -FoxO KO transcriptome.

**Table S2, related to Table 1. Predicted activation state of transcription factors**

| <i>Transcription Regulator</i> | <i>Predicted Activation State</i> | <i>z-score</i> | <i>p-value</i>       |
|--------------------------------|-----------------------------------|----------------|----------------------|
| Hic1                           | Activated                         | 2.796          | $1.8 \times 10^{-3}$ |
| Ppar $\alpha$                  | Activated                         | 2.417          | $1.3 \times 10^{-1}$ |
| Ppar $\gamma$                  | Activated                         | 2.385          | $2.4 \times 10^{-1}$ |
| Mycn                           | Activated                         | 2.300          | $3.9 \times 10^{-1}$ |
| Rb1                            | Activated                         | 2.137          | $1.1 \times 10^{-1}$ |
| Foxm1                          | Inhibited                         | -2.000         | $3.4 \times 10^{-2}$ |
| Irf7                           | Inhibited                         | -2.004         | $1.7 \times 10^{-1}$ |

Computational prediction of the activation state of transcriptional networks in  $\beta$ -FoxO KO mice, based on transcriptome analysis. A Z-score >2 is predictive of activation, while a z-score < -2 is predictive of inhibition.

**Table S3, related to Table 1. Top 25 networks**

| <b>Name</b>                                                                                                         | <b>Score</b> |
|---------------------------------------------------------------------------------------------------------------------|--------------|
| Gene Expression, Post-Translational Modification, Cellular Compromise                                               | 44           |
| Cellular Function and Maintenance, Molecular Transport, Cell-To-Cell Signaling and Interaction                      | 41           |
| Cell Signaling, Nucleic Acid Metabolism, Small Molecule Biochemistry                                                | 41           |
| RNA Post-Transcriptional Modification, Cellular Movement, Post-Translational Modification                           | 41           |
| Cell-To-Cell Signaling and Interaction, Cellular Assembly and Organization, Nervous System Development and Function | 40           |
| Carbohydrate Metabolism, Lipid Metabolism, Post-Translational Modification                                          | 39           |
| Drug Metabolism, Endocrine System Development and Function, Lipid Metabolism                                        | 39           |
| RNA Post-Transcriptional Modification, Hereditary Disorder, Neurological Disease                                    | 38           |
| Hereditary Disorder, Metabolic Disease, Cardiovascular Disease                                                      | 38           |
| Embryonic Development, Nervous System Development and Function, Organ Development                                   | 38           |
| DNA Replication, Recombination, and Repair, Cell Cycle, Cell Death                                                  | 37           |
| Nucleic Acid Metabolism, Small Molecule Biochemistry, Cardiovascular Disease                                        | 37           |
| Cell Cycle, DNA Replication, Recombination, and Repair, Cell-To-Cell Signaling and Interaction                      | 35           |
| Cancer, Cell-To-Cell Signaling and Interaction, Inflammatory Response                                               | 35           |
| Dermatological Diseases and Conditions, Developmental Disorder, Organismal Injury and Abnormalities                 | 34           |
| Drug Metabolism, Protein Synthesis, Cancer                                                                          | 34           |
| Protein Synthesis, Gene Expression, Cardiovascular System Development and Function                                  | 34           |
| Cell Death, Inflammatory Response, Infectious Disease                                                               | 33           |
| Developmental Disorder, Hereditary Disorder, Neurological Disease                                                   | 32           |
| Cell-To-Cell Signaling and Interaction, Cellular Function and Maintenance, Molecular Transport                      | 32           |
| Cellular Assembly and Organization, Cellular Movement, Nervous System Development and Function                      | 32           |
| Cell-To-Cell Signaling and Interaction, Nervous System Development and Function, Cell Morphology                    | 31           |
| Tissue Development, Cell-To-Cell Signaling and Interaction, Embryonic Development                                   | 31           |
| Cellular Function and Maintenance, Cellular Assembly and Organization, Gastrointestinal Disease                     | 30           |
| Hereditary Disorder, Infectious Disease, Carbohydrate Metabolism                                                    | 30           |

Non-directional networks from the analysis of  $\beta$ -FoxO KO transcriptome were generated based on the connectivity of Focus Genes in the ingenuity knowledge base. A higher score indicates greater statistical significance with < 1% chance of the Focus Genes being together in a network due to random chance.

**Table S4, related to Table 1. List of genes regulated by  $\geq \pm 2$ -fold**

| <i>Gene Symbol</i>   | <i>RefSeq</i> | <i>p-value</i> | <i>Fold-Change</i> | <i>KO</i> |
|----------------------|---------------|----------------|--------------------|-----------|
| <b>Serpina7</b>      | NM_177920     | 0.0111642      | 6.10514            | Up        |
| <b>Rsl1</b>          | NM_001013769  | 0.0414689      | 4.99012            | Up        |
| <b>Tcea1</b>         | NM_011541     | 0.0428449      | 4.72036            | Up        |
| <b>Ly96</b>          | NM_016923     | 0.0145388      | 3.54036            | Up        |
| <b>Asb11</b>         | NM_026853     | 0.00140206     | 2.9386             | Up        |
| <b>Tc2n</b>          | NM_001082976  | 0.0290396      | 2.91161            | Up        |
| <b>Aldh1a3</b>       | NM_053080     | 4.90E-06       | 2.87677            | Up        |
| <b>Fabp3</b>         | NM_010174     | 0.0107567      | 2.7083             | Up        |
| <b>Bet1</b>          | NM_009748     | 0.0446089      | 2.69339            | Up        |
| <b>Naa38</b>         | NM_133939     | 0.0279857      | 2.68719            | Up        |
| <b>Aass</b>          | NM_013930     | 0.00663965     | 2.58233            | Up        |
| <b>Gnpda2</b>        | NM_001038015  | 0.0200575      | 2.54645            | Up        |
| <b>Tmed6</b>         | NM_025458     | 0.0154591      | 2.52494            | Up        |
| <b>Arsk</b>          | NM_029847     | 0.00890659     | 2.5013             | Up        |
| <b>4930432O21Rik</b> | NM_001025373  | 0.0163108      | 2.47144            | Up        |
| <b>S100a1</b>        | NM_011309     | 0.00886515     | 2.44876            | Up        |
| <b>Gtf3c6</b>        | NM_026113     | 0.00778928     | 2.42173            | Up        |
| <b>Gm3604</b>        | NM_001162910  | 0.00843881     | 2.41623            | Up        |
| <b>Cetn2</b>         | NM_019405     | 0.00555014     | 2.40101            | Up        |
| <b>0610009B22Rik</b> | BC024353      | 0.0124628      | 2.39262            | Up        |
| <b>Vamp7</b>         | NM_011515     | 0.0383625      | 2.39248            | Up        |
| <b>Fam96a</b>        | NM_026635     | 0.0331078      | 2.33822            | Up        |
| <b>Ppp2r3c</b>       | NM_021529     | 0.0271285      | 2.33742            | Up        |
| <b>Arl6</b>          | NM_019665     | 0.020463       | 2.29758            | Up        |
| <b>Tceal1</b>        | NM_146236     | 0.0173341      | 2.28281            | Up        |
| <b>Fam107a</b>       | NM_183187     | 0.00143458     | 2.28199            | Up        |
| <b>Nxt2</b>          | NM_172782     | 0.0230735      | 2.24335            | Up        |
| <b>Dhrs1</b>         | NM_026819     | 0.0400549      | 2.24112            | Up        |
| <b>Mc5r</b>          | NM_013596     | 0.0277206      | 2.24063            | Up        |
| <b>Zfp758</b>        | NM_145484     | 0.00877272     | 2.23204            | Up        |
| <b>Gabra4</b>        | NM_010251     | 0.0029828      | 2.21679            | Up        |
| <b>Gstk1</b>         | NM_029555     | 0.0250684      | 2.21367            | Up        |
| <b>Gc</b>            | NM_008096     | 0.0302735      | 2.2136             | Up        |
| <b>Ube2g1</b>        | NM_025985     | 0.0196621      | 2.1793             | Up        |
| <b>Sumo1</b>         | NM_009460     | 0.0492272      | 2.17814            | Up        |
| <b>Tnfrsf11b</b>     | NM_008764     | 0.00451015     | 2.17536            | Up        |
| <b>Ndufs8</b>        | NM_144870     | 0.0204631      | 2.15693            | Up        |
| <b>Pou3f4</b>        | NM_008901     | 0.0356638      | 2.14325            | Up        |
| <b>Gatc</b>          | NM_029645     | 0.0308833      | 2.13377            | Up        |
| <b>Il1r2</b>         | NM_010555     | 0.00557243     | 2.12099            | Up        |
| <b>Nsun3</b>         | NM_178925     | 0.0233136      | 2.12087            | Up        |
| <b>Ubl5</b>          | NM_025401     | 0.0238611      | 2.10567            | Up        |
| <b>Zfp758</b>        | NM_145484     | 0.00554606     | 2.09893            | Up        |
| <b>Spc25</b>         | NM_025565     | 0.0219171      | 2.08955            | Up        |
| <b>Pfn2</b>          | NM_019410     | 0.0435835      | 2.08917            | Up        |
| <b>BC048546</b>      | NM_001001179  | 0.0291405      | 2.07485            | Up        |
| <b>Eapp</b>          | NM_025456     | 0.0344546      | 2.06206            | Up        |
| <b>Srek1ip1</b>      | NM_026075     | 0.0176001      | 2.05832            | Up        |
| <b>Fundc1</b>        | NM_028058     | 0.0131075      | 2.04164            | Up        |
| <b>Ndufs4</b>        | NM_010887     | 0.0318198      | 2.03858            | Up        |
| <b>Trappc2</b>       | NM_025432     | 0.0156154      | 2.0358             | Up        |
| <b>Cript</b>         | NM_019936     | 0.0399088      | 2.02949            | Up        |
| <b>Crbn</b>          | NM_021449     | 0.0194331      | 2.02776            | Up        |
| <b>Ndufb9</b>        | NM_023172     | 0.0354024      | 2.02202            | Up        |
| <b>Nupr1</b>         | NM_019738     | 0.0143316      | 2.01786            | Up        |
| <b>Nudt11</b>        | NM_021431     | 0.0470274      | 2.00691            | Up        |
| <b>Eml5</b>          | NM_001081191  | 0.0174169      | -2.04931           | Down      |
| <b>Muc4</b>          | NM_080457     | 0.0121668      | -2.04958           | Down      |

|                      |           |           |          |      |
|----------------------|-----------|-----------|----------|------|
| <b>Meg3</b>          | NR_027651 | 0.010206  | -2.22119 | Down |
| <b>Myl7</b>          | NM_022879 | 0.010106  | -2.33234 | Down |
| <b>6330403K07Rik</b> | NM_134022 | 8.77E-05  | -2.68071 | Down |
| <b>Eid3</b>          | NM_025499 | 0.0280126 | -3.14097 | Down |
| <b>Gm3579</b>        | AY140896  | 0.0334865 | -3.53078 | Down |

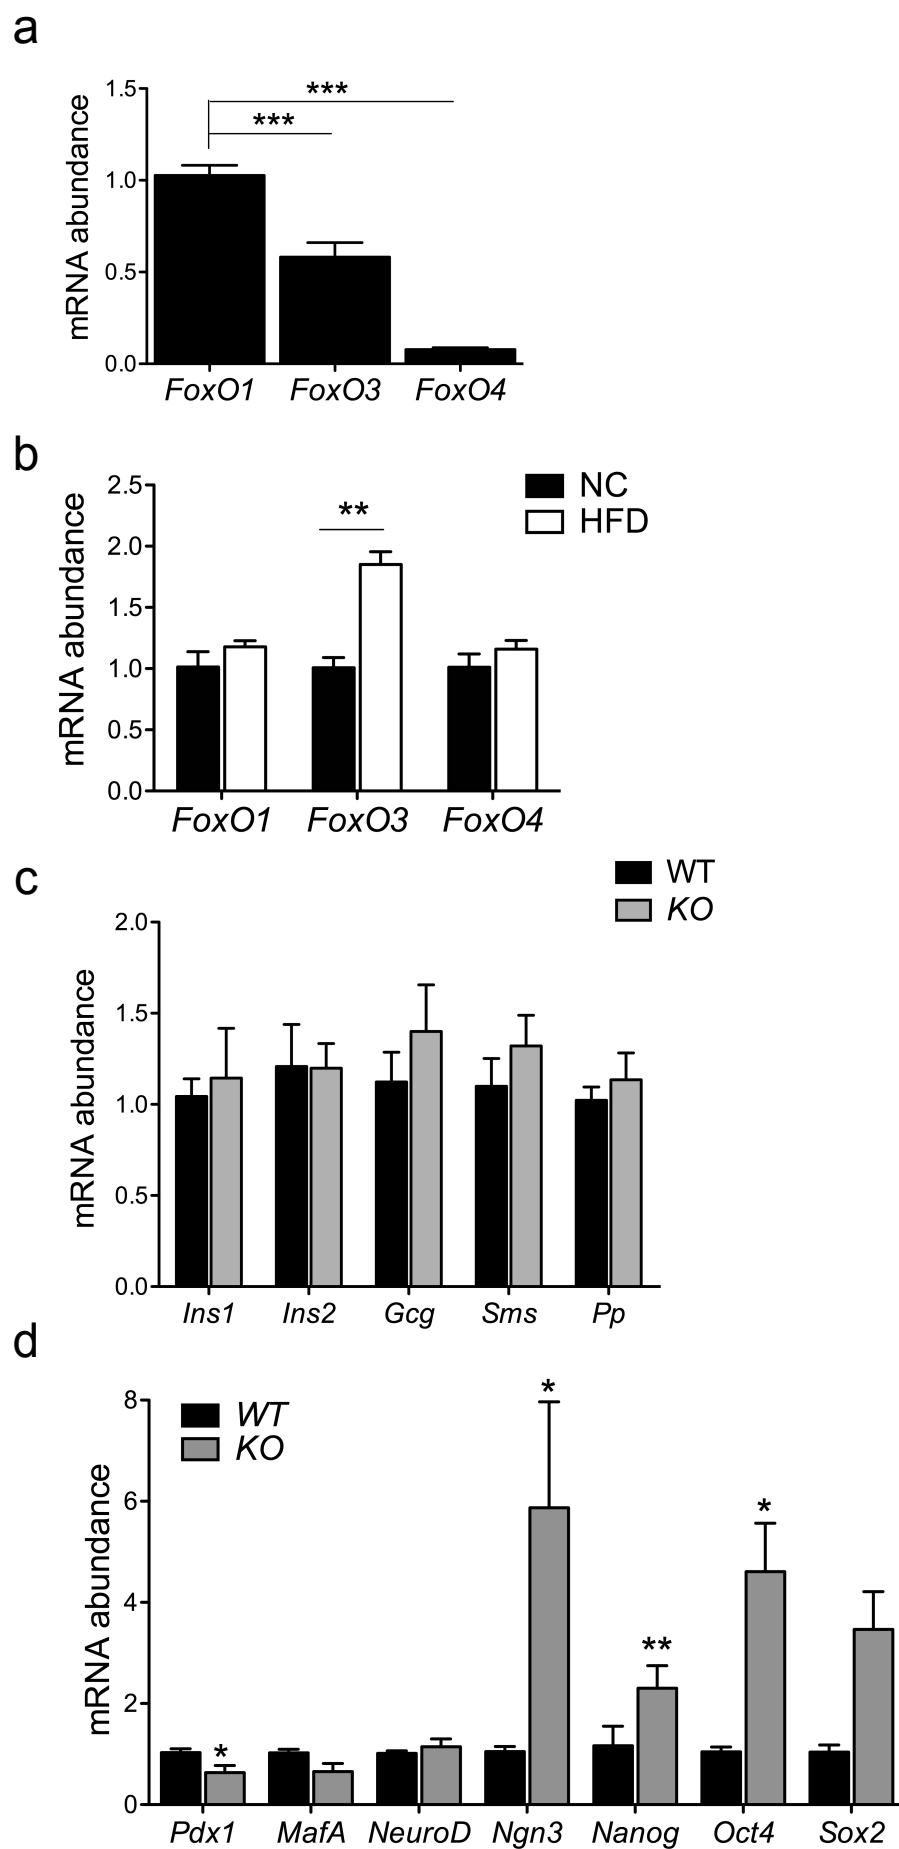

Figure S1

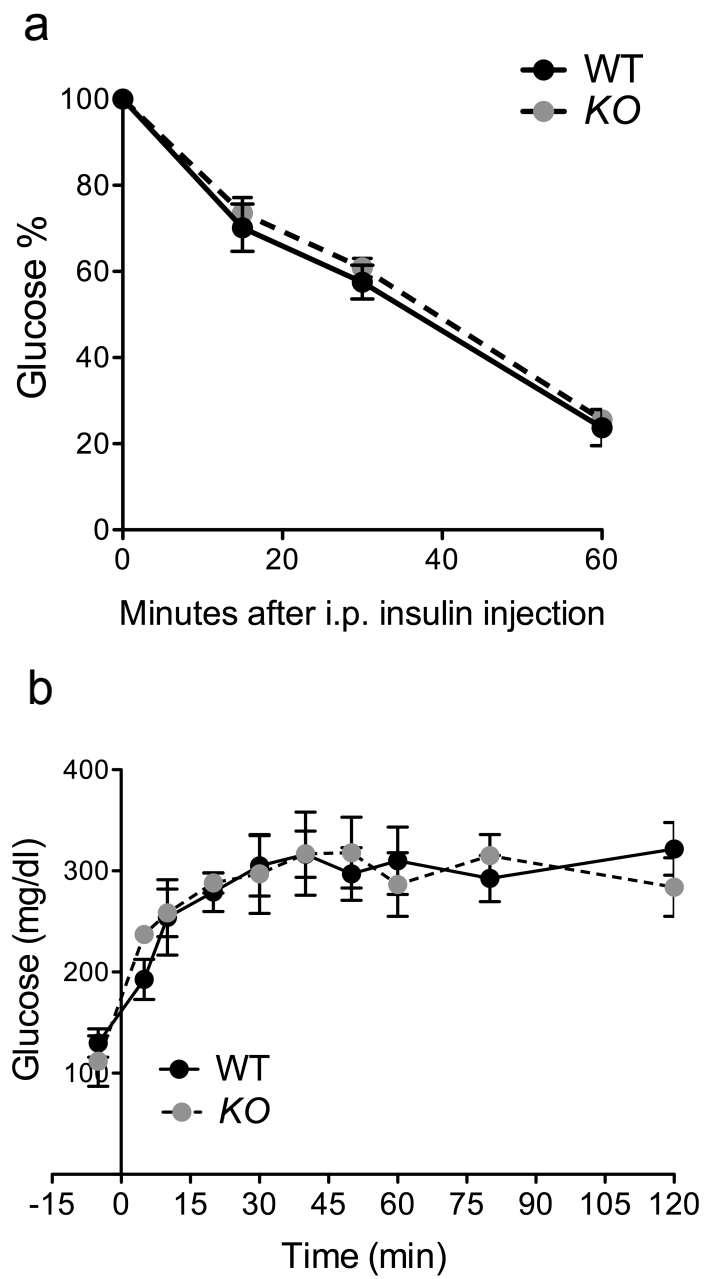

Figure S2

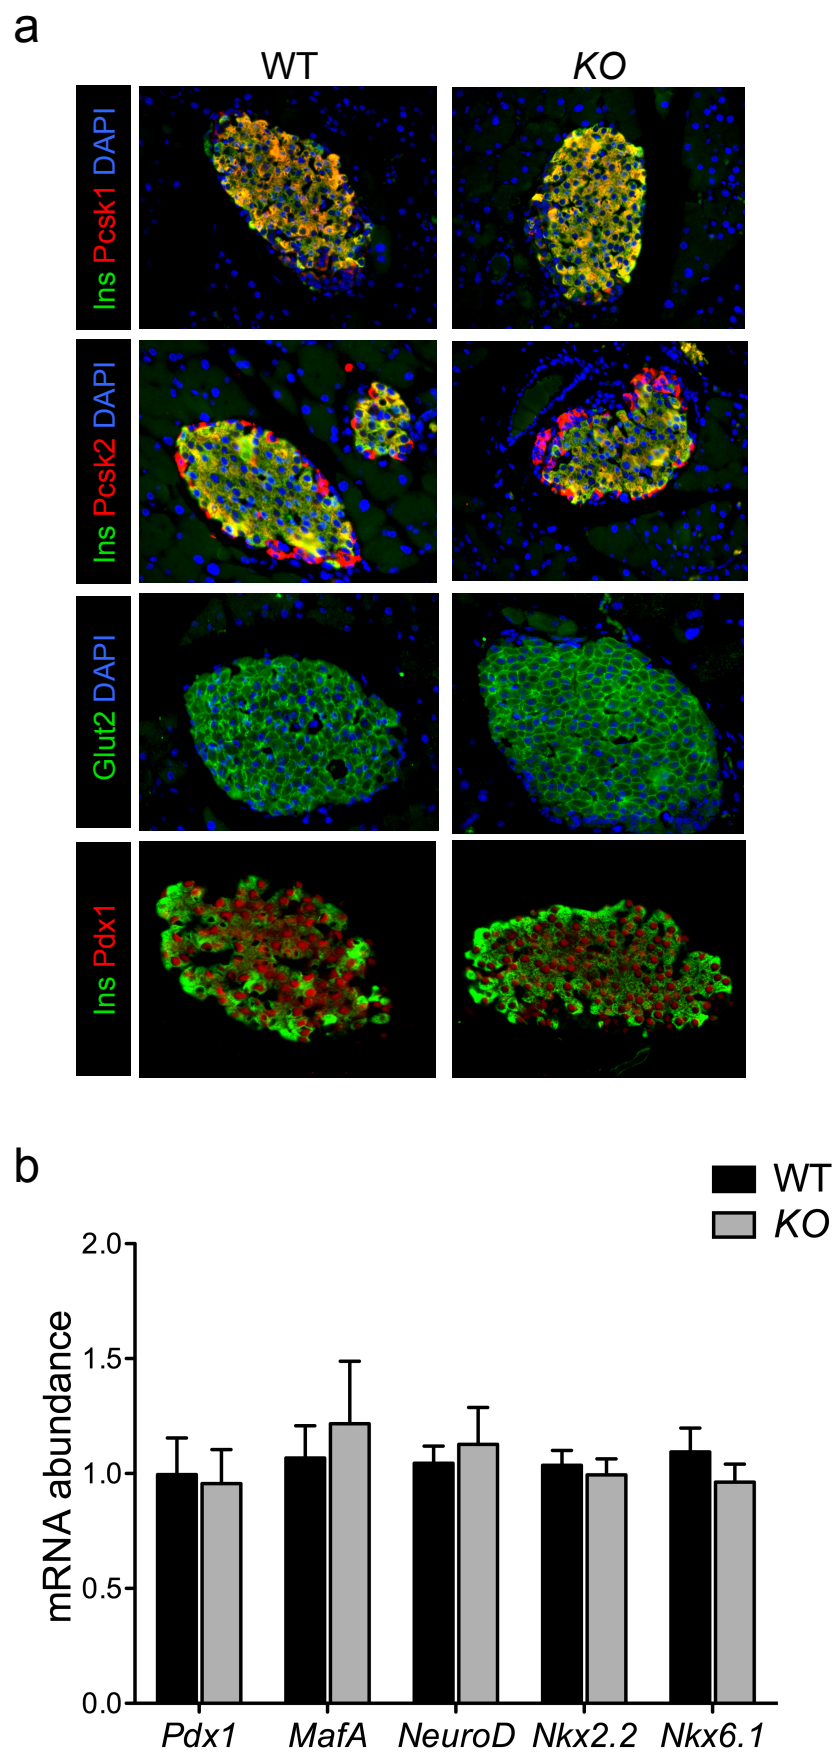

Figure S3

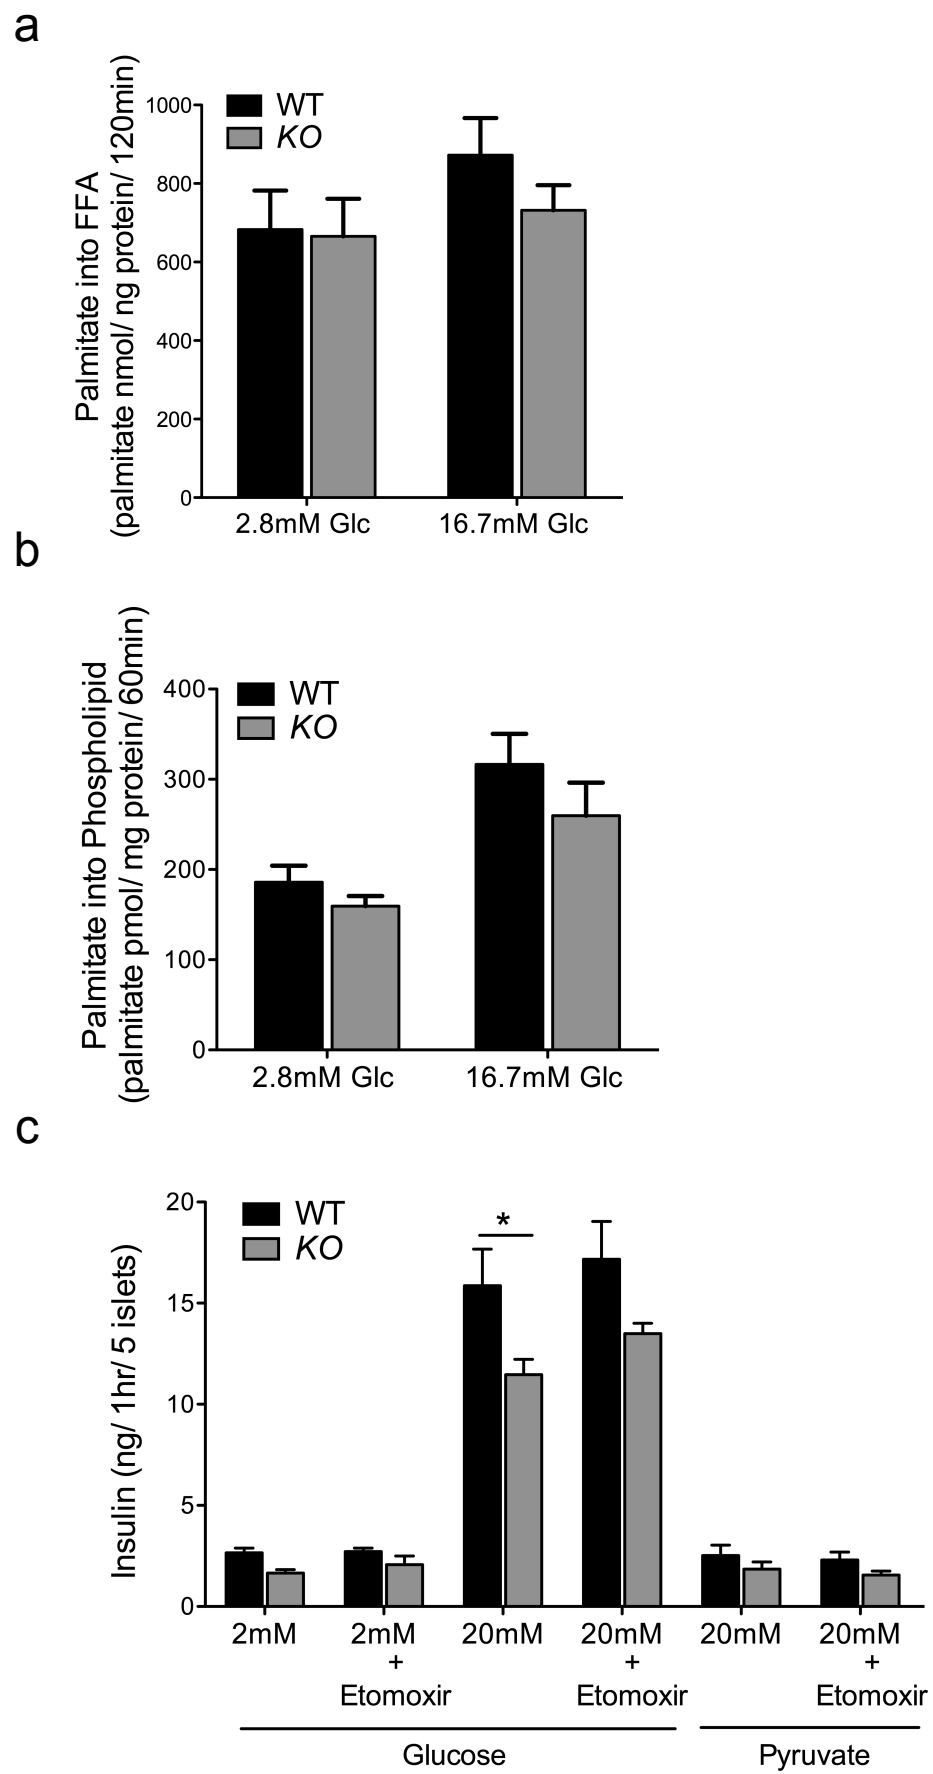

Figure S4

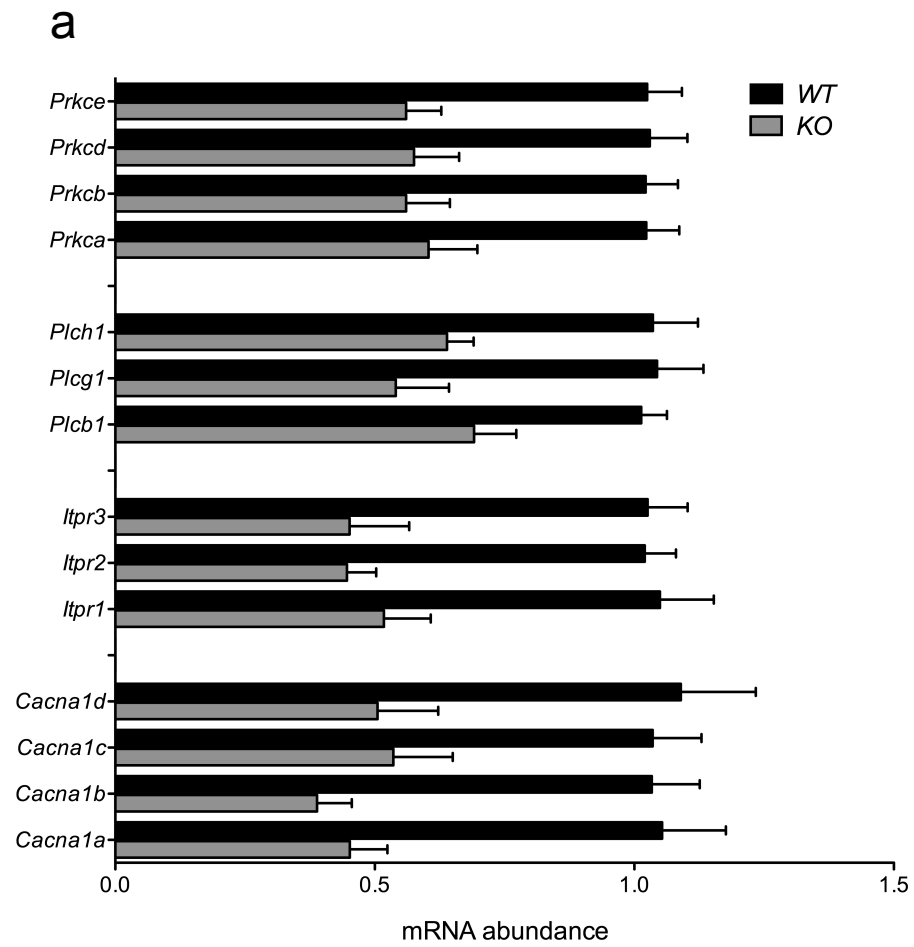

Figure S5
